# Supplementary material
Source: MDPI journal article supplement (https://www.mdpi.com/1999-4907/10/11/1043)

**A.**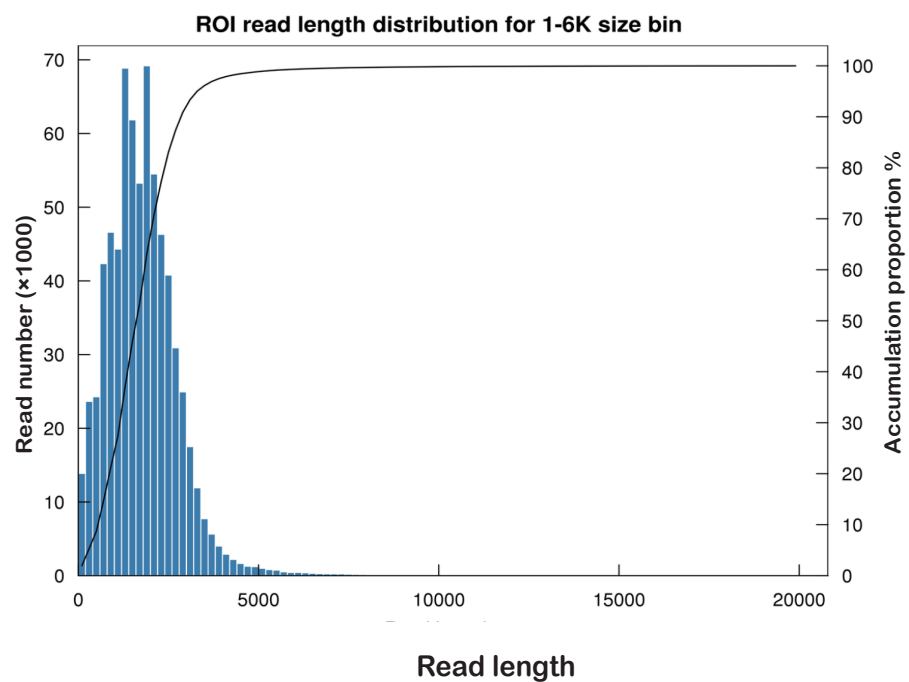**B.**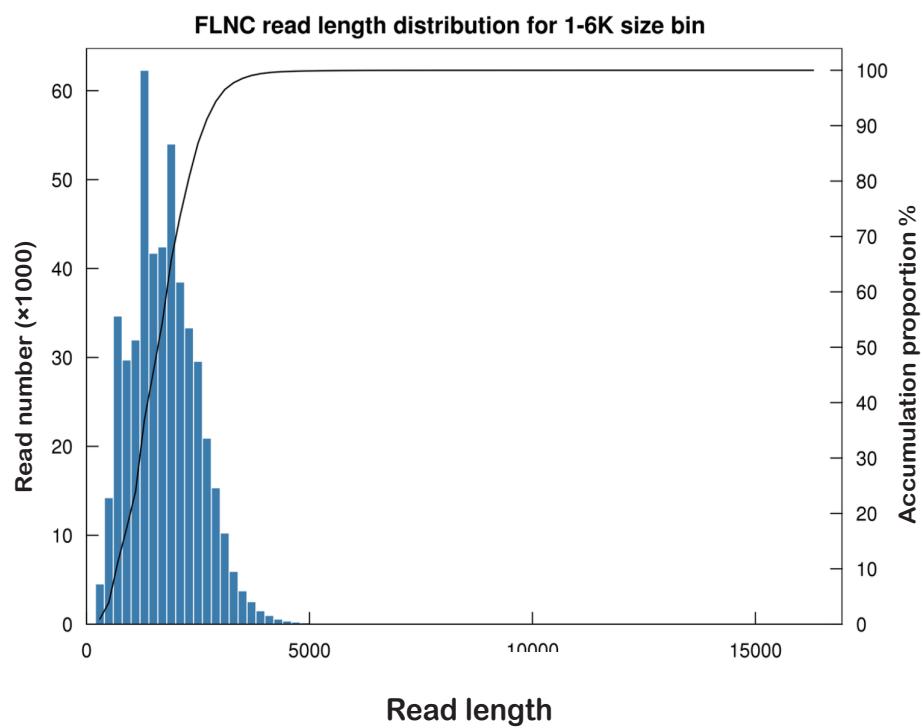

Supplement: s1 [file s1]
